# Supplementary material for: Molecular patterning on carbon based surfaces through photobiotin activation
Source: Royal Society of Chemistry journal article supplement (doi:10.1039/b008475l), 2001-01-01

Photomicrograph of a square pattern on polycarbonate. The pattern was produced using a 400 mesh grid as a photomask and developed using avidin rhodamine. The squares are approximately 40m in size.


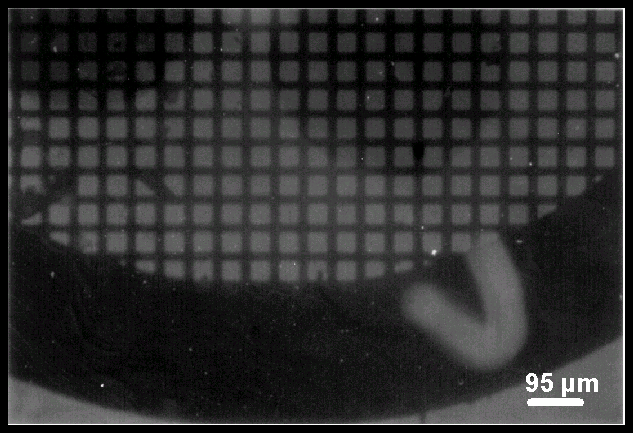

Supplement: figure.doc [file figure.doc]
